# Supplementary material for: Nanoscale reshaping of resonant dielectric microstructures by light-driven explosions
Source: PubMed Central journal article supplement (PMC10590427; doi:10.1038/s41467-023-42263-w), 2023-10-21
Supplement: 41467_2023_42263_MOESM3_ESM.pdf [file 41467_2023_42263_MOESM3_ESM.pdf]

## Description of Additional Supplementary Files

**Supplementary Movie 1.** PIC-calculated evolution of the electric field in the M-shaped resonator.

**Supplementary Movie 2.** PIC-calculated evolution of the electron in the M-shaped resonator superimposed over the electric field (the brown contour corresponds to  $E = 2.6 \text{ V nm}^{-1}$ ).

**Supplementary Movie 3.** PIC-calculated evolution of the electron temperature in the M-shaped resonator.

**Supplementary Movie 4.** PIC-calculated evolution of the ion temperature in the M-shaped resonator.

**Supplementary Movie 5.** PIC-calculated evolution of ion density in the resonator, x-y middle section.

**Supplementary Movie 6.** PIC-calculated evolution of ion density in the resonator, y-z middle section.
